# Supplementary material for: Comparison of Multi-locus Genotypes Detected in Aspergillus fumigatus Isolated from COVID Associated Pulmonary Aspergillosis (CAPA) and from Other Clinical and Environmental Sources
Source: MDPI journal article supplement (doi:10.3390/jof9030298), 2023-02-24
Supplement: s1 [file s1]

**Table S1.** Isolate characterization of the isolates analyzed in the study.

|       | Isolate source | Year | Sample  | Source                  | Fragment Size<br>(base pairs)              |             |             | Number of Repeats |             |              | <i>cyp51A</i> and<br>Promotor Mu-<br>tation | AfumID<br>Clade |
|-------|----------------|------|---------|-------------------------|--------------------------------------------|-------------|-------------|-------------------|-------------|--------------|---------------------------------------------|-----------------|
|       |                |      |         |                         | STRAf3<br>A                                | STRAf3<br>B | STRAf3<br>C | STRAf<br>3A       | STRAf<br>3B | STRA<br>f 3C |                                             |                 |
| CD7   | Environment    | 2018 | Air     | Private home            | 129,05                                     | 176,69      | 80,22       | 7                 | 15          | 6            | N.A.                                        | Susceptible     |
| CD10  | Environment    | 2018 | Surface | Lift truck AC<br>filter | 189,21                                     | 162,26      | 120,84      | 26                | 10          | 19           | N.A.                                        | Susceptible     |
| CD18A | Environment    | 2018 | Surface | Taxi's AC fil-<br>ter   | 145,34                                     | 168,05      | 120,51      | 12                | 12          | 19           | N.A.                                        | Susceptible     |
| CD18B | Environment    | 2018 | Surface | Taxi's AC fil-<br>ter   | 145,47                                     | 167,97      | 114,57      | 12                | 12          | 17           | N.A.                                        | Susceptible     |
| CD19A | Environment    | 2018 | Surface | Taxi's AC fil-<br>ter   | DNA did not amplify, culture not available |             |             |                   |             |              | -                                           | -               |
| CD19B | Environment    | 2018 | Surface | Taxi's AC fil-<br>ter   | 180,16                                     | 162,26      | 105,54      | 24                | 10          | 14           | N.A.                                        | Resistant       |
| CD32  | Environment    | 2018 | Air     | Private home            | 186,19                                     | 162,25      | 105,51      | 25                | 10          | 14           | N.A.                                        | Resistant       |
| CD157 | Environment    | 2018 | Air     | Bakery                  | Contaminated, multiple peaks               |             |             |                   |             |              | -                                           | -               |
| CD184 | Environment    | 2018 | Air     | Private home<br>(EDC)   | 170,98                                     | 176,82      | 123,94      | 21                | 15          | 20           | N.A.                                        | Susceptible     |
| CD186 | Environment    | 2018 | Air     | Private home<br>(EDC)   | 145,61                                     | 168,27      | 120,78      | 12                | 12          | 19           | N.A.                                        | Susceptible     |
| CD200 | Environment    | 2018 | Air     | Private home<br>(EDC)   | 189,4                                      | 165,19      | 114,69      | 26                | 11          | 17           | N.A.                                        | Susceptible     |
| CD201 | Environment    | 2018 | Air     | Private home<br>(EDC)   | 219,54                                     | 182,58      | 136,44      | 36                | 17          | 24           | N.A.                                        | Susceptible     |
| CD203 | Environment    | 2018 | Air     | Private home<br>(EDC)   | 283,22                                     | 165,15      | 159,41      | 57                | 11          | 32           | N.A.                                        | Susceptible     |
| CD215 | Environment    | 2018 | Air     | Private home<br>(EDC)   | 201,5                                      | 165,23      | 108,66      | 30                | 11          | 15           | N.A.                                        | Susceptible     |
| CD223 | Environment    | 2018 | Air     | Private home<br>(EDC)   | 145,69                                     | 168,07      | 120,85      | 12                | 12          | 19           | N.A.                                        | Susceptible     |
| CD226 | Environment    | 2018 | Air     | Private home<br>(EDC)   | 192,44                                     | 162,29      | 117,7       | 27                | 10          | 18           | N.A.                                        | Susceptible     |

|        |             |      |         |                                |        |        |        |    |    |    |      |             |
|--------|-------------|------|---------|--------------------------------|--------|--------|--------|----|----|----|------|-------------|
| CD228  | Environment | 2018 | Air     | Private home (EDC)             | 177,09 | 227,86 | 93,31  | 23 | 32 | 10 | N.A. | Resistant   |
| CD257  | Environment | 2018 | Air     | Dairy                          | 192,33 | 162,25 | 90,02  | 27 | 10 | 9  | N.A. | Resistant   |
| CD259  | Environment | 2018 | Air     | Dairy                          | 183,1  | 162,24 | 108,57 | 24 | 10 | 15 | N.A. | Resistant   |
| CD261  | Environment | 2018 | Air     | Dairy                          | 252,9  | 167,92 | 156,29 | 47 | 12 | 31 | N.A. | Susceptible |
| CD280  | Environment | 2018 | Air     | Private home (EDC)             | 216,55 | 159,36 | 177,83 | 35 | 9  | 38 | N.A. | Resistant   |
| HSMA34 | Environment | 2012 | Air     | H3 hematology unit             | 192,24 | 165,22 | 108,46 | 27 | 11 | 15 | N.A. | Susceptible |
| HSMA38 | Environment | 2012 | Air     | H3 hematology unit             | 186,21 | 165,11 | 146,41 | 25 | 11 | 27 | N.A. | Susceptible |
| HSMA44 | Environment | 2012 | Air     | H3 hematology unit             | 183,26 | 165,24 | 123,82 | 25 | 11 | 20 | N.A. | Susceptible |
| HSMA65 | Environment | 2012 | Air     | H3 bone marrow transplant unit | 195,36 | 165,25 | 102,67 | 28 | 11 | 13 | N.A. | Susceptible |
| HSMA66 | Environment | 2012 | Surface | H3 ICU unit                    | 195,35 | 165,15 | 102,67 | 28 | 11 | 13 | N.A. | Susceptible |
| HSMA67 | Environment | 2012 | Surface | H3 hematology unit             | 195,34 | 165,15 | 102,67 | 28 | 11 | 13 | N.A. | Susceptible |
| HSMA75 | Environment | 2012 | Air     | H3 emergency room              | 222,41 | 159,29 | 123,76 | 37 | 9  | 20 | N.A. | Susceptible |
| HSMA91 | Environment | 2017 | Air     | H3 emergency room              | 189,3  | 162,46 | 114,78 | 26 | 10 | 17 | N.A. | Susceptible |
| HSMA92 | Environment | 2017 | Air     | H3 emergency room              | 155,61 | 168,18 | 123,92 | 16 | 12 | 20 | N.A. | Susceptible |
| HSMA93 | Environment | 2017 | Surface | H3 file unit                   | 155,56 | 168,02 | 123,88 | 16 | 12 | 20 | N.A. | Susceptible |
| HSMA99 | Environment | 2017 | Soil    | H3                             | 195,4  | 165,35 | 102,65 | 28 | 11 | 13 | N.A. | Susceptible |

|         |                                    |      |                                              |                                            |        |        |        |    |    |    |      |             |
|---------|------------------------------------|------|----------------------------------------------|--------------------------------------------|--------|--------|--------|----|----|----|------|-------------|
|         |                                    |      |                                              | Potted plant<br>from waiting<br>room       |        |        |        |    |    |    |      |             |
| HSMA107 | Environment                        | 2017 | Surface                                      | H3<br>file unit                            | 155,63 | 168,19 | 123,8  | 16 | 12 | 20 | N.A. | Susceptible |
| HSMA108 | Environment                        | 2017 | Soil                                         | H3<br>Potted plant<br>from waiting<br>room | 189,36 | 162,29 | 114,71 | 26 | 10 | 17 | N.A. | Susceptible |
| VA7     | Respiratory sample<br>(non-COVID+) | 2013 | Clinical sample: Sputum                      | H3                                         | 237,59 | 162,34 | 80,2   | 42 | 10 | 6  | N.A. | Resistant   |
| VA12    | Respiratory sample<br>(non-COVID+) | 2013 | Clinical sample: Sputum                      | H3                                         | 219,56 | 165,27 | 90,01  | 36 | 11 | 9  | N.A. | Susceptible |
| VA21    | Respiratory sample<br>(non-COVID+) | 2013 | Clinical sample: BAL                         | H6                                         | 219,47 | 171,13 | 120,78 | 36 | 13 | 19 | N.A. | Susceptible |
| VA22    | Respiratory sample<br>(non-COVID+) | 2013 | Clinical sample: Bronchial<br>secretions     | H6                                         | 207,37 | 182,52 | 105,7  | 32 | 17 | 14 | N.A. | Susceptible |
| VA24    | Respiratory sample<br>(non-COVID+) | 2013 | Clinical sample: BAL                         | H2                                         | 189,3  | 162,34 | 80,62  | 26 | 10 | 6  | N.A. | Resistant   |
| VA25    | Respiratory sample<br>(non-COVID+) | 2014 | Clinical sample: BAL                         | H7                                         | 186,28 | 162,13 | 117,59 | 25 | 10 | 18 | N.A. | Susceptible |
| VA31    | Respiratory sample<br>(non-COVID+) | 2014 | Clinical sample: Bronchial<br>aspirate       | H11                                        | 138,76 | 162,34 | 77,16  | 10 | 10 | 5  | N.A. | Resistant   |
| VA52    | Respiratory sample<br>(non-COVID+) | 2015 | Clinical sample: Sputum                      | H1                                         | 142,22 | 162,34 | 102,67 | 11 | 10 | 13 | N.A. | Resistant   |
| VA55    | Respiratory sample<br>(non-COVID+) | 2015 | Clinical sample: Respira-<br>tory secretions | H1                                         | 222,4  | 191,11 | 159,42 | 37 | 20 | 32 | N.A. | Susceptible |
| VA57    | Respiratory sample<br>(non-COVID+) | 2015 | Clinical sample: Respira-<br>tory secretions | H1                                         | 192,27 | 165,15 | 102,68 | 27 | 11 | 13 | N.A. | Resistant   |
| VA58    | Respiratory sample<br>(non-COVID+) | 2015 | Clinical sample: Sputum                      | H1                                         | 219,52 | 159,41 | 83,55  | 36 | 9  | 7  | N.A. | Resistant   |
| VA64    | Respiratory sample<br>(non-COVID+) | 2015 | Clinical sample: Respira-<br>tory secretions | H1                                         | 186,36 | 165,29 | 123,89 | 26 | 11 | 20 | N.A. | Susceptible |
| VA73    | Respiratory sample<br>(non-COVID+) | 2015 | Clinical sample: BAL                         | H1                                         | 264,97 | 168,07 | 174,69 | 51 | 12 | 37 | N.A. | Susceptible |
| VA77    | Deep infection<br>(non-COVID+)     | 2015 | Clinical sample: Bronchial<br>biopsy         | H1                                         | 174,15 | 171,07 | 127,16 | 22 | 13 | 21 | N.A. | Susceptible |

|       |                                     |      |                                                            |                   |        |        |        |    |    |    |                  |             |
|-------|-------------------------------------|------|------------------------------------------------------------|-------------------|--------|--------|--------|----|----|----|------------------|-------------|
| VA83  | Deep infection (non-COVID+)         | 2015 | Clinical sample: Peritoneal fluid                          | H1                | 216,43 | 168,22 | 105,65 | 35 | 12 | 14 | N.A.             | Susceptible |
| VA85  | Respiratory sample (non-COVID+) - R | 2015 | Clinical sample: BL                                        | H8                | 280,18 | 171    | 171,7  | 56 | 13 | 36 | No amplification | Susceptible |
| VA86  | Environment - R                     | 2015 | Air                                                        | Pig farming       | 225,38 | 216,58 | 123,78 | 38 | 28 | 20 | G54R             | Susceptible |
| VA95  | Environment - R                     | 2015 | Air                                                        | N.A.              | 280,07 | 171    | 171,71 | 56 | 13 | 36 | Not detected     | Susceptible |
| VA105 | Respiratory sample (non-COVID+)     | 2015 | Clinical sample: Bronchial secretions                      | H2                | 192,38 | 165,27 | 108,75 | 27 | 11 | 15 | N.A.             | Susceptible |
| VA121 | Respiratory sample (non-COVID+)     | 2016 | Clinical sample: Bronchial secretions                      | H5                | 249,75 | 179,63 | 123,76 | 46 | 16 | 20 | N.A.             | Susceptible |
| VA132 | Animal                              | 2016 | Clinical sample (animal source): Bird air sac              | N.A.              | 204,4  | 165,24 | 102,64 | 31 | 11 | 13 | N.A.             | Susceptible |
| VA133 | Respiratory sample (non-COVID+)     | 2016 | Clinical sample: BAL                                       | H11               | 225,54 | 165,27 | 207,84 | 38 | 11 | 47 | N.A.             | Susceptible |
| VA146 | Respiratory sample (non-COVID+)     | 2017 | Clinical sample: BAL                                       | H2                | 152,46 | 165,87 | 102,67 | 15 | 11 | 13 | N.A.             | Susceptible |
| VA180 | Respiratory sample (non-COVID+)     | 2017 | Clinical sample: BAL                                       | H8                | 183,27 | 230,85 | 105,61 | 25 | 33 | 14 | N.A.             | Susceptible |
| VA183 | Deep infection (non-COVID+)         | 2017 | Clinical sample: Chest drainage pus                        | Guiné             | 168,1  | 194,32 | 73,89  | 20 | 21 | 4  | N.A.             | Susceptible |
| VA219 | Deep infection (non-COVID+)         | 2018 | Clinical sample: Brain biopsy                              | H6                | 186,29 | 162,33 | 123,92 | 25 | 10 | 20 | N.A.             | Susceptible |
| VA221 | Respiratory sample (non-COVID+)     | 2018 | Clinical sample: Sputum                                    | H1                | 189,47 | 162,5  | 124,01 | 27 | 10 | 20 | N.A.             | Susceptible |
| VA225 | Respiratory sample (non-COVID+)     | 2018 | Clinical sample: BAL, bronchial and tracheal aspirate      | H10               | 180,3  | 165,92 | 83,52  | 24 | 11 | 7  | N.A.             | Susceptible |
| VA236 | Respiratory sample (non-COVID+)     | 2018 | Clinical sample: BL                                        | H8                | 152,64 | 166,04 | 96,53  | 15 | 11 | 11 | N.A.             | Susceptible |
| VA268 | Environment                         | 2018 | Soil                                                       | Oceanarium gravel | 201,47 | 159,3  | 77,05  | 30 | 9  | 5  | N.A.             | Resistant   |
| VA290 | Animal                              | 2018 | Clinical sample (animal source): Bird air sac - diver bird | N.A.              | 180,23 | 165,81 | 83,39  | 24 | 11 | 7  | N.A.             | Susceptible |
| VA303 | Respiratory sample (non-COVID+) - R | 2018 | Clinical sample: BL                                        | H8                | 135,65 | 159,54 | 93,31  | 9  | 9  | 10 | TR34/L98H        | Resistant   |

|       |                                     |      |                                                            |      |                                                            |        |        |    |    |    |                           |             |
|-------|-------------------------------------|------|------------------------------------------------------------|------|------------------------------------------------------------|--------|--------|----|----|----|---------------------------|-------------|
| VA304 | Respiratory sample (non-COVID+)     | 2018 | Clinical sample: BAL                                       | H8   | 149,23                                                     | 168,27 | 111,85 | 14 | 12 | 16 | N.A.                      | Susceptible |
| VA309 | Respiratory sample (non-COVID+)     | 2019 | Clinical sample: BAL                                       | H4   | 192,27                                                     | 162,25 | 165,45 | 27 | 10 | 34 | N.A.                      | Resistant   |
| VA310 | Respiratory sample (non-COVID+)     | 2019 | Clinical sample: Sputum                                    | H9   | 201,51                                                     | 165,34 | 93,4   | 30 | 11 | 10 | N.A.                      | Susceptible |
| VA311 | Respiratory sample (non-COVID+)     | 2019 | Clinical sample: BL                                        | H8   | 186,52                                                     | 165,42 | 123,93 | 26 | 11 | 20 | N.A.                      | Susceptible |
| VA314 | Respiratory sample (non-COVID+)     | 2019 | Clinical sample: Respiratory sample (non-COVID+)           | H5   | 186,39                                                     | 165,32 | 123,99 | 26 | 11 | 20 | N.A.                      | Susceptible |
| VA317 | Deep infection (non-COVID+)         | 2019 | Clinical sample: Brain biopsy                              | H1   | 213,35                                                     | 176,61 | 120,81 | 34 | 15 | 19 | N.A.                      | Susceptible |
| VA321 | Respiratory sample (non-COVID+)     | 2019 | Clinical sample: BL                                        | H8   | 158,72                                                     | 162,44 | 99,64  | 17 | 10 | 12 | N.A.                      | Resistant   |
| VA328 | Respiratory sample (non-COVID+) - R | 2019 | Clinical sample: BAL                                       | H8   | 213,35                                                     | 162,24 | 86,67  | 34 | 10 | 8  | Not detected              | Resistant   |
| VA329 | Environment                         | 2019 | Hospital environment                                       | H3   | 210,3                                                      | 182,44 | 102,48 | 33 | 17 | 13 | N.A.                      | Susceptible |
| VA330 | Environment                         | 2019 | Hospital environment                                       | H3   | 152,24                                                     | 188,22 | 114,62 | 14 | 19 | 17 | N.A.                      | Susceptible |
| VA334 | Respiratory sample (non-COVID+)     | 2019 | Clinical sample: BL                                        | H8   | 198,44                                                     | 182,61 | 130,25 | 29 | 17 | 22 | N.A.                      | Susceptible |
| VA346 | Respiratory sample (non-COVID+) - R | 2019 | Clinical sample: Bronchial secretions                      | H2   | 186,28                                                     | 180    | 105,53 | 25 | 16 | 14 | F46Y, M172V, N248T, D255E | Resistant   |
| VA352 | Deep infection (non-COVID+)         | 2019 | Clinical sample: Pleural fluid                             | H7   | DNA did not amplify, inviable, culture growth not obtained |        |        |    |    |    | N.A.                      | -           |
| VA362 | Animal                              | 2020 | Clinical sample (animal source): Granuloma from oceanarium | N.A. | 129,19                                                     | 165,09 | 143,07 | 7  | 11 | 26 | N.A.                      | Susceptible |
| VA370 | Animal                              | 2020 | Clinical sample (animal source): Strain from dolphin       | N.A. | 228,63                                                     | 199,67 | 139,66 | 39 | 22 | 25 | N.A.                      | Susceptible |
| VA378 | Respiratory sample                  | 2020 | Clinical sample: Respiratory sample                        | H1   | 129,29                                                     | 250,85 | 139,68 | 7  | 40 | 25 | N.A.                      | Susceptible |
| VA379 | Respiratory sample (COVID+)         | 2020 | Clinical sample: Respiratory sample                        | H1   | 186,28                                                     | 162,25 | 108,7  | 25 | 10 | 15 | N.A.                      | Resistant   |
| VA380 | Respiratory sample (COVID+)         | 2020 | Clinical sample: Respiratory sample                        | H1   | 207,47                                                     | 168    | 120,57 | 32 | 12 | 19 | N.A.                      | Susceptible |

|       |                                 |      |                                                               |                 |                                                            |        |        |    |    |    |      |             |
|-------|---------------------------------|------|---------------------------------------------------------------|-----------------|------------------------------------------------------------|--------|--------|----|----|----|------|-------------|
| VA381 | Respiratory sample (COVID+)     | 2020 | Clinical sample: BAL                                          | H1              | 204,52                                                     | 159,41 | 90,1   | 31 | 9  | 9  | N.A. | Resistant   |
| VA382 | Respiratory sample (COVID+)     | 2020 | Clinical sample: Sputum                                       | H1              | 135,43                                                     | 162,25 | 90,1   | 9  | 10 | 9  | N.A. | Resistant   |
| VA388 | Respiratory sample (COVID+)     | 2021 | Clinical sample: Bronchial secretions                         | H1              | 192,32                                                     | 162,13 | 120,64 | 27 | 10 | 19 | N.A. | Susceptible |
| VA390 | Respiratory sample (COVID+)     | 2021 | Clinical sample: Respiratory secretions                       | H1              | 228,53                                                     | 196,93 | 102,7  | 39 | 22 | 13 | N.A. | Susceptible |
| VA392 | Respiratory sample (COVID+)     | 2020 | Clinical sample: Sputum                                       | H1              | 129,22                                                     | 250,87 | 136,54 | 7  | 40 | 24 | N.A. | Susceptible |
| VA393 | Animal                          | 2021 | Clinical sample (animal source): Dolphin respiratory exsudate | N.A.            | 129,22                                                     | 165,24 | 150    | 7  | 11 | 29 | N.A. | Susceptible |
| VA394 | Respiratory sample (COVID+)     | 2021 | Clinical sample: Respiratory secretions                       | H1              | 195,33                                                     | 162,38 | 120,79 | 28 | 10 | 19 | N.A. | Susceptible |
| VA396 | Respiratory sample              | 2021 | Clinical sample: BAL                                          | H1              | 186,16                                                     | 165,09 | 120,81 | 25 | 11 | 19 | N.A. | Susceptible |
| VA399 | Respiratory sample (COVID+)     | 2021 | Clinical sample: BAL                                          | H5              | 180,07                                                     | 162,25 | 105,49 | 23 | 10 | 14 | N.A. | Resistant   |
| VA404 | Respiratory sample (non-COVID+) | 2021 | Clinical sample: Respiratory secretions                       | H2              | 240,58                                                     | 165,15 | 177,75 | 43 | 11 | 38 | N.A. | Susceptible |
| VA420 | Environment                     | 2021 | Soil                                                          | Beach           | DNA did not amplify, inviable, culture growth not obtained |        |        |    |    |    |      | -           |
| VA426 | Respiratory sample (non-COVID+) | 2021 | Clinical sample: Bronchial secretions                         | H2              | 204,29                                                     | 168,14 | 93,27  | 31 | 12 | 10 | N.A. | Resistant   |
| VA429 | Respiratory sample (COVID+)     | 2021 | Clinical sample: Respiratory secretions                       | H1              | 258,84                                                     | 165,05 | 93,03  | 49 | 11 | 10 | N.A. | Susceptible |
| VA437 | Respiratory sample (non-COVID+) | 2021 | Clinical sample: Respiratory secretions                       | H2              | 189,38                                                     | 165,33 | 123,95 | 26 | 11 | 20 | N.A. | Susceptible |
| VA442 | Environment                     | 2021 | Soil sample: Beach sand                                       | N.A.            | 145,62                                                     | 168,02 | 120,79 | 12 | 12 | 19 | N.A. | Susceptible |
| VA443 | Respiratory sample (COVID+)     | 2021 | Clinical sample: Respiratory secretions                       | H1              | 155,49                                                     | 159,41 | 93,37  | 16 | 9  | 10 | N.A. | Resistant   |
| VA449 | Respiratory sample (non-COVID+) | 2022 | Clinical sample: Bronchial secretions                         | N.A.            | 152,39                                                     | 273,27 | 114,59 | 15 | 47 | 17 | N.A. | Susceptible |
| VA458 | Environment                     | 2022 | Water                                                         | Water reservoir | 155,45                                                     | 162,2  | 129,88 | 16 | 10 | 22 | N.A. | Susceptible |
| VA459 | Animal                          | 2022 | Clinical sample (animal source): Dolphin respiratory exudate  | N.A.            | 204,42                                                     | 159,27 | 80,14  | 31 | 9  | 6  | N.A. | Resistant   |

|          |                        |      |                           |                           |                                    |        |       |    |   |   |                     |           |
|----------|------------------------|------|---------------------------|---------------------------|------------------------------------|--------|-------|----|---|---|---------------------|-----------|
| VA299CP  | Environment - <b>R</b> | 2019 | Air sample: Cowshed       | N.A.                      | 201,47                             | 159,29 | 89,81 | 30 | 9 | 9 | TR34/L98H/N<br>248K | Resistant |
| V A873CP | Environment - <b>R</b> | 2019 | Filter from worker's mask | Waste sorting<br>industry | One of the markers did not amplify |        |       |    |   |   | TR34/L98H/N<br>248K | -         |
| VA1209CP | Environment - <b>R</b> | 2019 | Filter from worker's mask | Waste sorting<br>industry | One of the markers did not amplify |        |       |    |   |   | <i>Wild type</i>    | -         |

AC – air conditioner; EDC – electrostatic dust collector; BAL – bronchoalveolar lavage; BL – bronchial lavage; H1 to H10 –hospitals' ID (from where the isolates were collected); N.A. – non applicable; R – resistant to azoles.

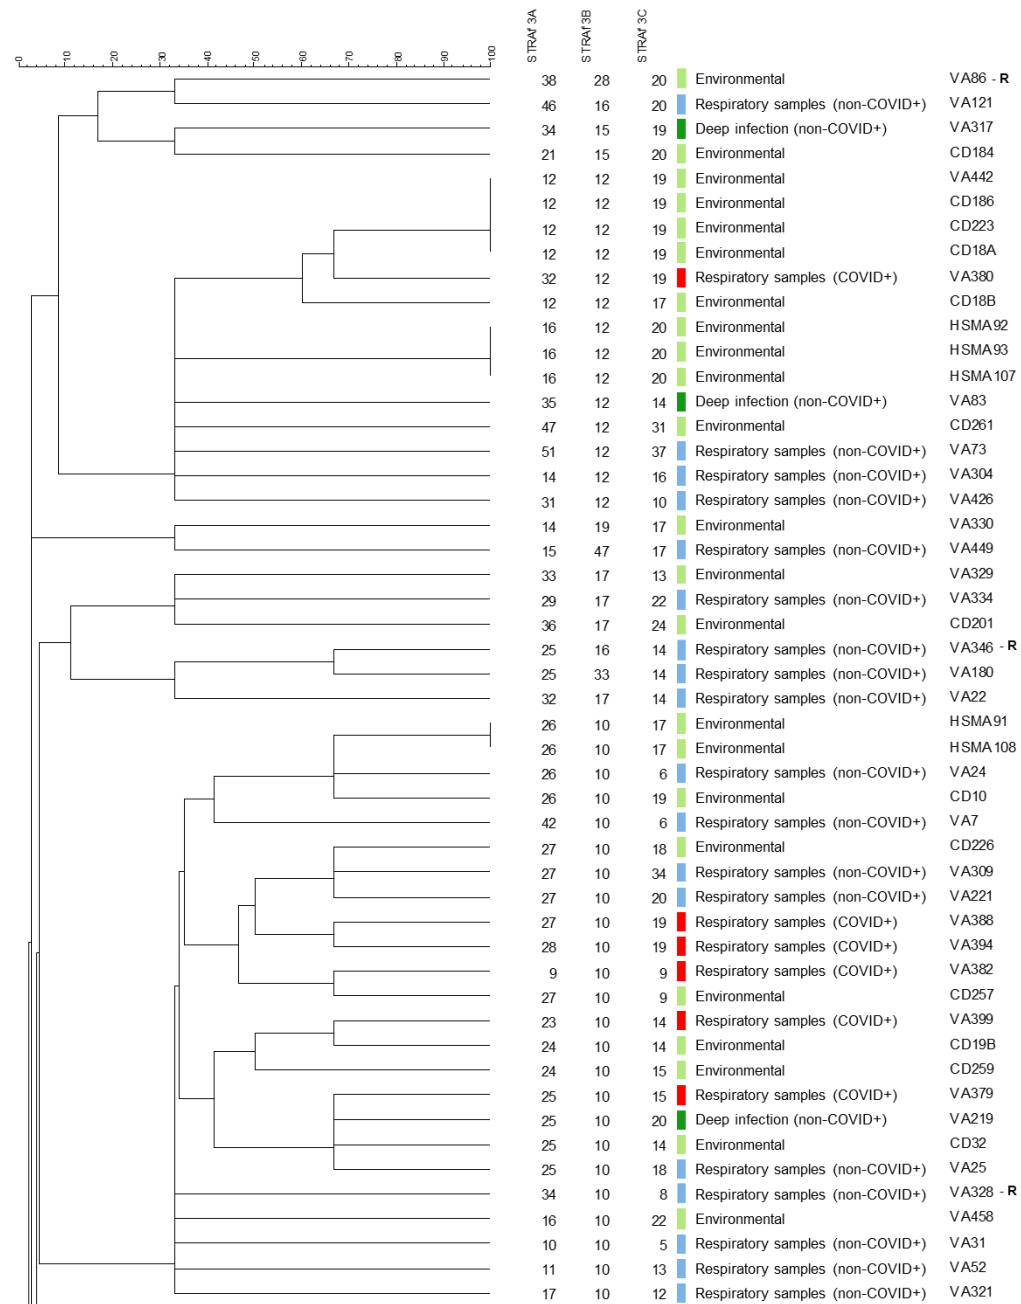



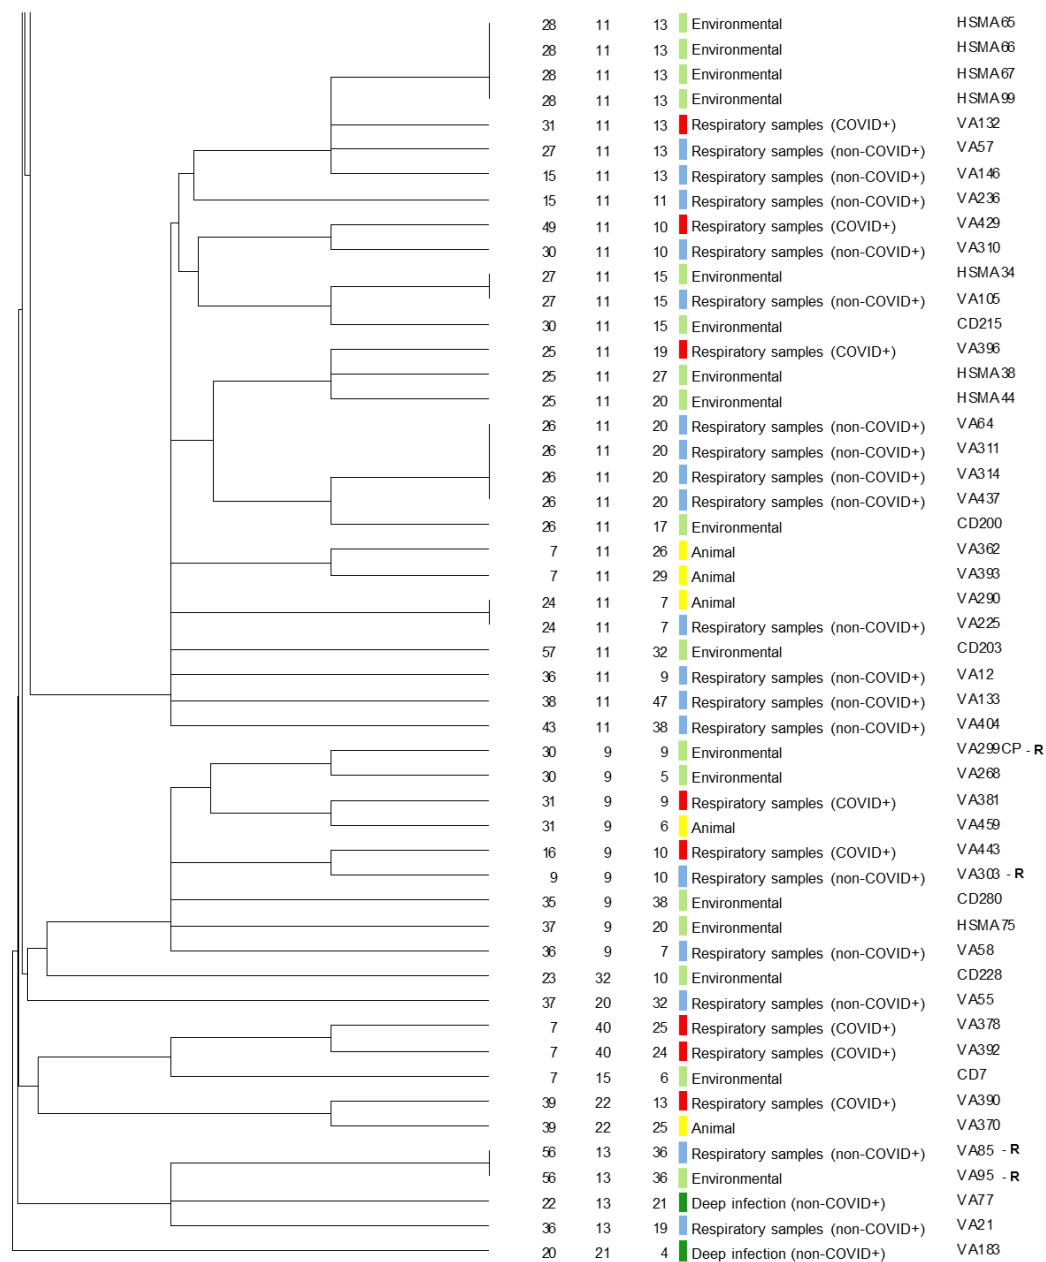

**Figure S1.** Dendrogram obtained in the Bionumerics 6.6 software (Applied Maths) using a categorical similarity coefficient and an unweighted paired group method with arithmetic mean (UPGMA) for the cluster analysis. R – resistant to azoles.
